# Supplementary material for: Air Pollution and Climate Drive Annual Growth in Ponderosa Pine Trees in Southern California
Source: MDPI journal article supplement (doi:10.3390/cli9050082), 2021-05-13
Supplement: s1 [file s1]

Archive with 1 entries (1 files):
- climate-1182762-supplementary.pdf
